# Supplementary material for: Adapting CAR T-cell therapy for glioblastoma to the post-surgical immunosuppressive microenvironment
Source: Research Square preprint supplement (doi:10.21203/rs.3.rs-8733195/v1), 2026-02-10
Supplement: Supplementary file 1 [file 1ac9b1ffc402d41f6bb91637.pdf]

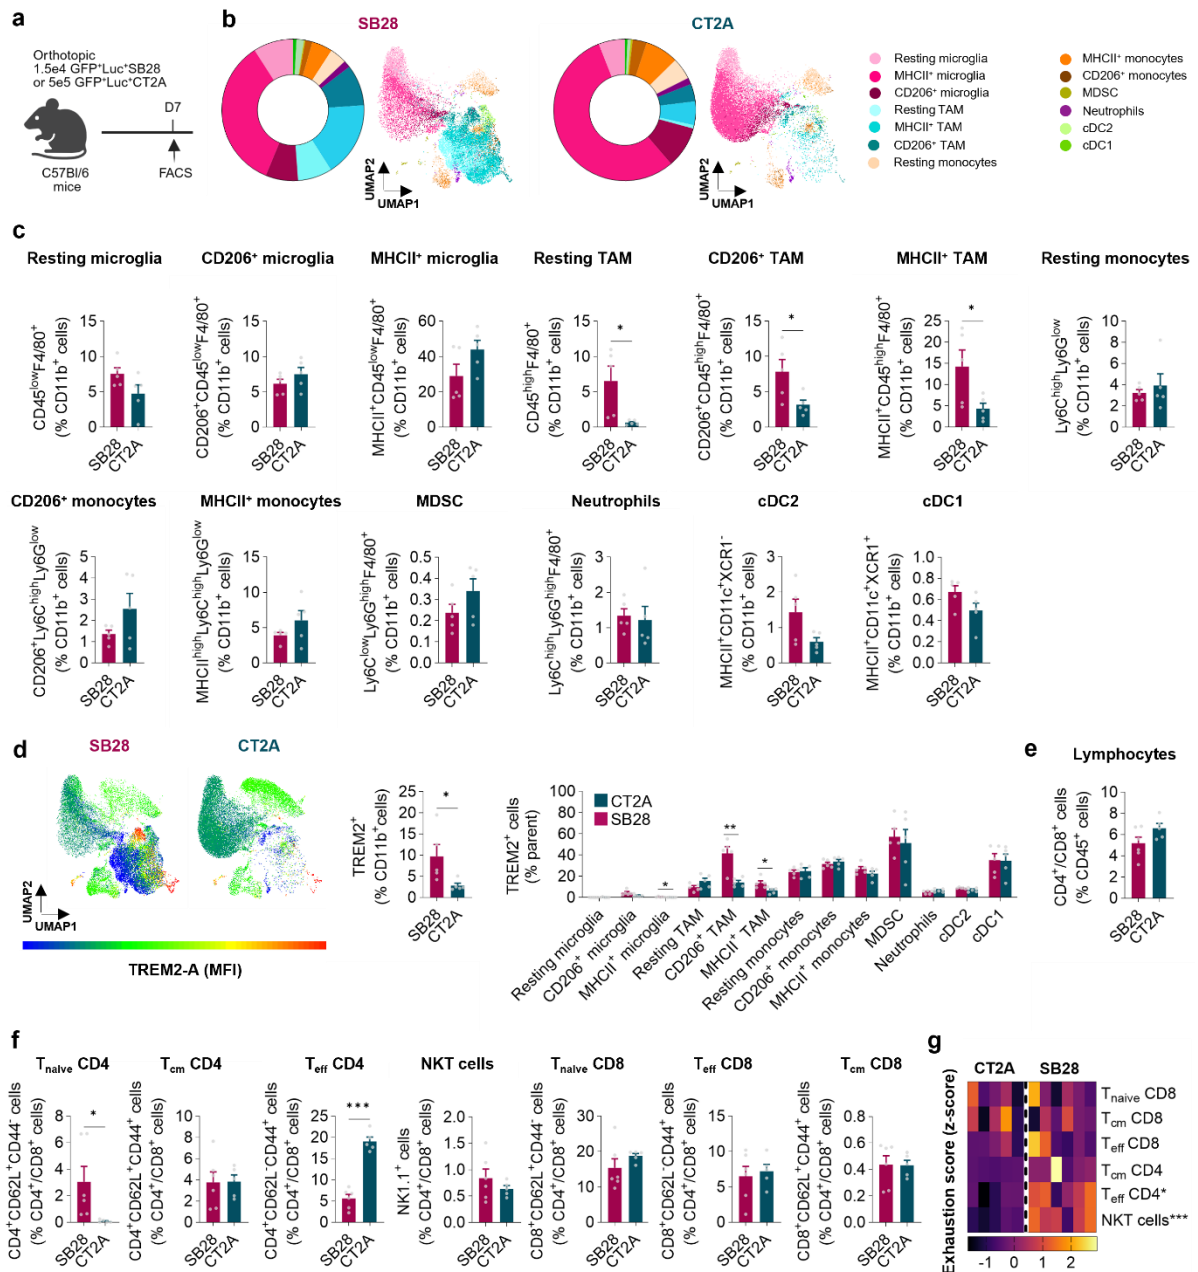

**Supplemental figure 1. Baseline immune landscape of SB28 and CT2A tumors prior to resection.** (a) Experimental scheme comparing orthotopic CT2A and SB28 tumors on TME at day 7 (D7) by flow cytometry. (b) Uniform manifold approximation and projection (UMAP) visualization of flow cytometry analysis of CD45<sup>+</sup>CD11b<sup>+</sup> myeloid populations and donut charts showing the distribution of major myeloid subsets in CT2A and SB28 tumors at D7. (c) Frequency of microglial, dendritic cell (cDC1 and cDC2), myeloid-derived suppressor cells (MDSC), neutrophil, tumor-associated macrophage (TAM), and monocyte subsets in CT2A vs SB28 tumors, shown as percentage of CD11b<sup>+</sup> cells (n=5 mice per group). (d) UMAP visualization of flow cytometry analysis of CD45<sup>+</sup>CD11b<sup>+</sup> myeloid population colored by TREM2 expression intensity in SB28 and CT2A tumors (left panel). Frequency of TREM2<sup>+</sup> cells among total CD11b<sup>+</sup> myeloid cells in SB28 and CT2A tumors, and distribution of TREM2 expression across individual myeloid subsets (right panel) (n=5 mice per group). (e) Frequency of total CD4<sup>+</sup>/CD8<sup>+</sup> lymphocytes among CD45<sup>+</sup> cells in SB28 and CT2A tumors. (f) Frequency of lymphoid subsets, including CD4<sup>+</sup> and CD8<sup>+</sup> naïve (T<sub>naive</sub>), central memory (T<sub>cm</sub>), and

effector ( $T_{\text{eff}}$ ) populations, as well NKT cells, expressed as percentages of  $CD4^+/CD8^+$  in SB28 and CT2A tumors at D7 (n=5-6 mice per group). (g) Heatmap showing exhaustion scores (z-scores; see Methods) for indicated lymphoid subsets in SB28 and CT2A tumors at D7. Data are shown as mean  $\pm$  SEM with individual data points representing mice (n = 5-6 per group). Statistical analyses were performed using unpaired two-tailed t-tests. \* $p < 0.05$ , \*\* $p < 0.01$ , \*\*\* $p < 0.001$ .

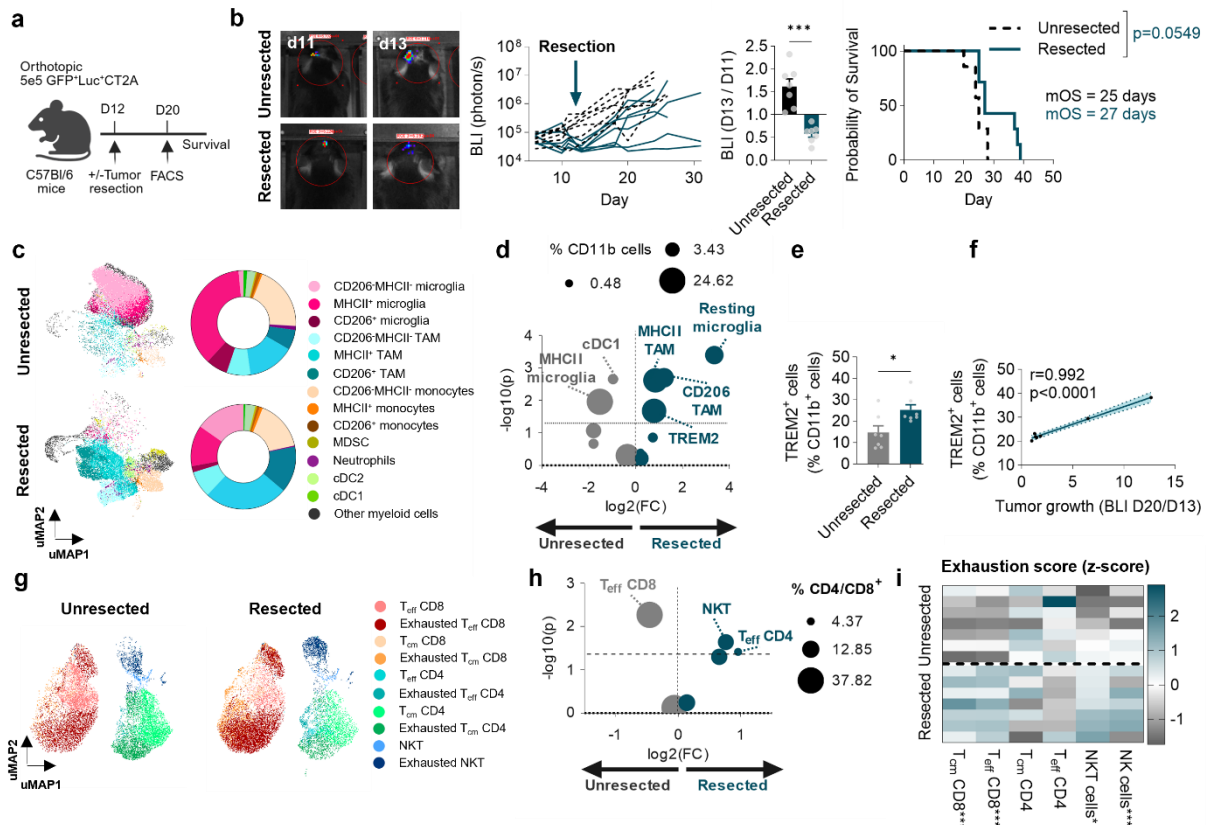

**Supplemental figure 2. Tumor resection induces delayed myeloid remodeling and TREM2 upregulation in orthotopic CT2A model.** (a) Experimental scheme comparing unresected and resected orthotopic CT2A tumors on TME at day 20 (D20) by flow cytometry. (b) Left to right: representative bioluminescence imaging (BLI) at days 11 and 13 post-implantation, longitudinal BLI quantification, comparison of BLI signal between days 10 and 11, and Kaplan–Meier survival analysis of unresected and resected mice (log-rank test). mOS=median of survival. (c) Uniform manifold approximation and projection (UMAP) visualization of flow cytometry analysis of CD45<sup>+</sup>CD11b<sup>+</sup> myeloid populations and donut charts showing the distribution of major myeloid subsets in unresected and resected CT2A tumors. (d) Volcano plot showing differential abundance of myeloid populations between unresected and resected CT2A tumors; dot size reflects mean population frequency. (e) Frequency of TREM2<sup>+</sup> cells among CD11b<sup>+</sup> myeloid cells in unresected and resected CT2A tumors (mean ± SEM, n = 6–7 mice per group). (f) Pearson correlation between TREM2<sup>+</sup> myeloid cell frequency and tumor growth (BLI ratio D20/D11) in the CT2A model; shaded area indicates 95% confidence interval. (k) UMAP visualization of CD45<sup>+</sup> lymphoid populations in unresected and resected SB28 tumors. (l) Volcano plot of differential lymphoid population abundance between unresected and resected SB28 tumors. (m) Heatmaps showing exhaustion scores (z-scores; see Methods) for indicated lymphoid subsets in unresected and resected tumors in CT2A model (n = 7 mice per group). Data are shown as mean ± SEM unless indicated. Unpaired or paired two-tailed t-tests were used as appropriate. \*p < 0.05, \*\*\*p < 0.001.

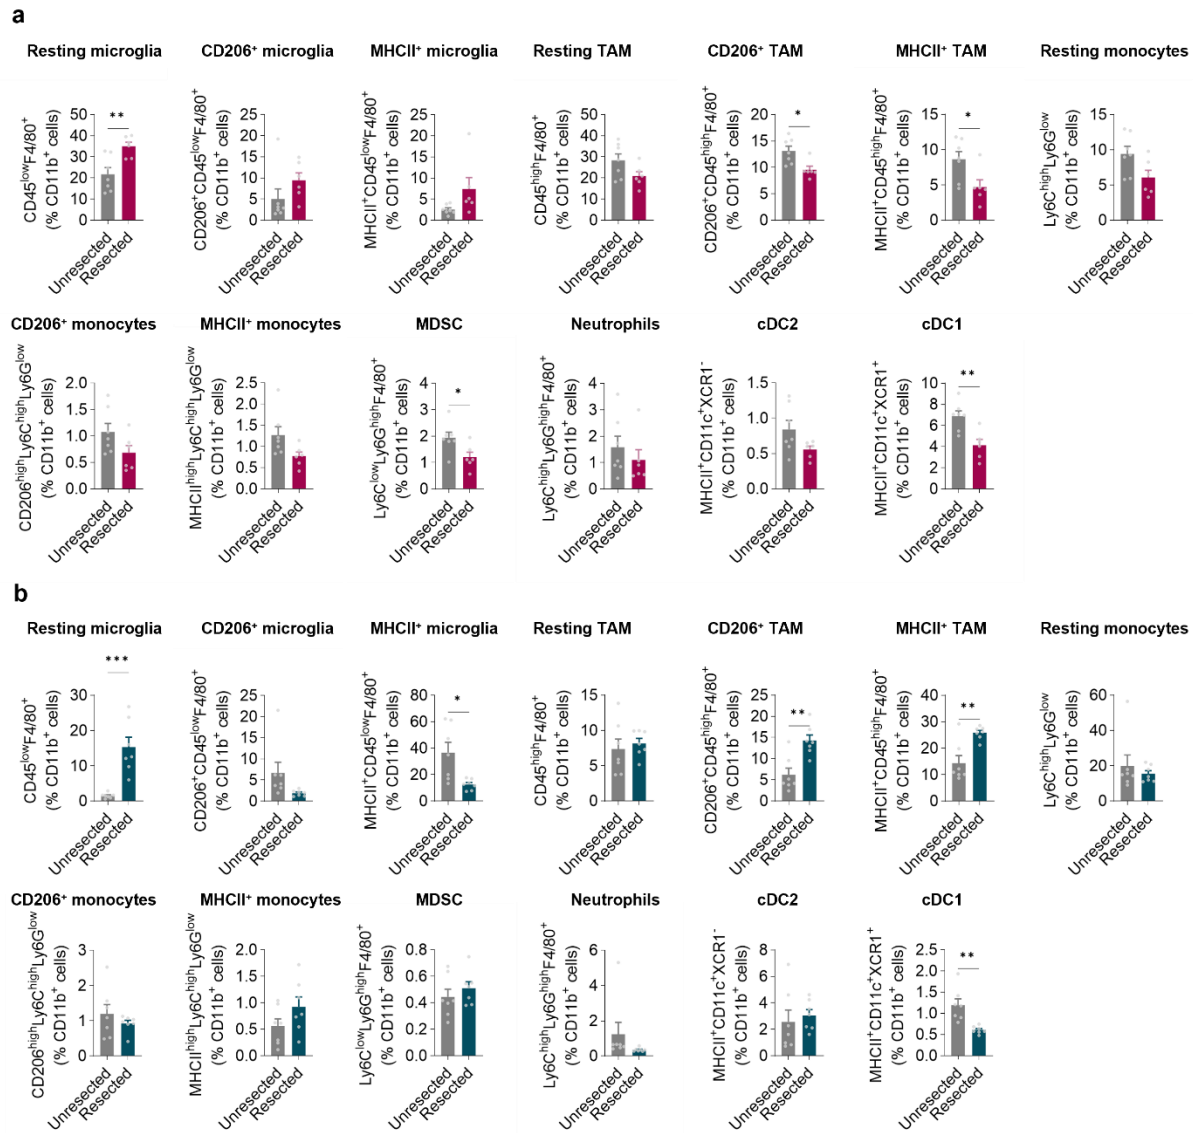

**Supplemental figure 3. Tumor resection induces delayed myeloid remodeling in orthotopic GBM models.** (a) Frequency of microglial, dendritic cell (cDC1 and cDC2), myeloid-derived suppressor cells (MDSC), neutrophil, tumor-associated macrophage (TAM), and monocyte subsets in unresected vs resected SB28 tumors, shown as percentage of CD11b<sup>+</sup> cells. (b) Frequency of microglial, dendritic cell (cDC1 and cDC2), myeloid-derived suppressor cells (MDSC), neutrophil, tumor-associated macrophage (TAM), and monocyte subsets in unresected vs resected CT2A tumors, shown as percentage of CD11b<sup>+</sup> cells. Data are shown as mean  $\pm$  SEM with individual data points representing mice (n=6–7 per group). Statistical analyses were performed using unpaired two-tailed t-tests. \*p < 0.05, \*\*p < 0.01, \*\*\*p < 0.001.

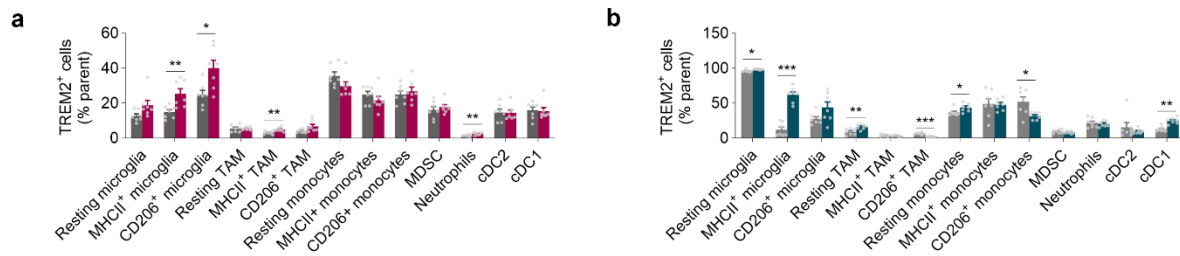

**Supplemental figure 4. Tumor resection induces TREM2 upregulation in orthotopic GBM models.** (a) Distribution of TREM2<sup>+</sup> cells across individual myeloid cell subsets in SB28 tumors at day 20. (b) Distribution of TREM2<sup>+</sup> cells across individual myeloid cell subsets in CT2A tumors at day 20. Data are shown as mean  $\pm$  SEM with individual data points representing mice (n=6–7 per group). Statistical analyses were performed using unpaired two-tailed t-tests. \*p < 0.05, \*\*p < 0.01, \*\*\*p < 0.001.

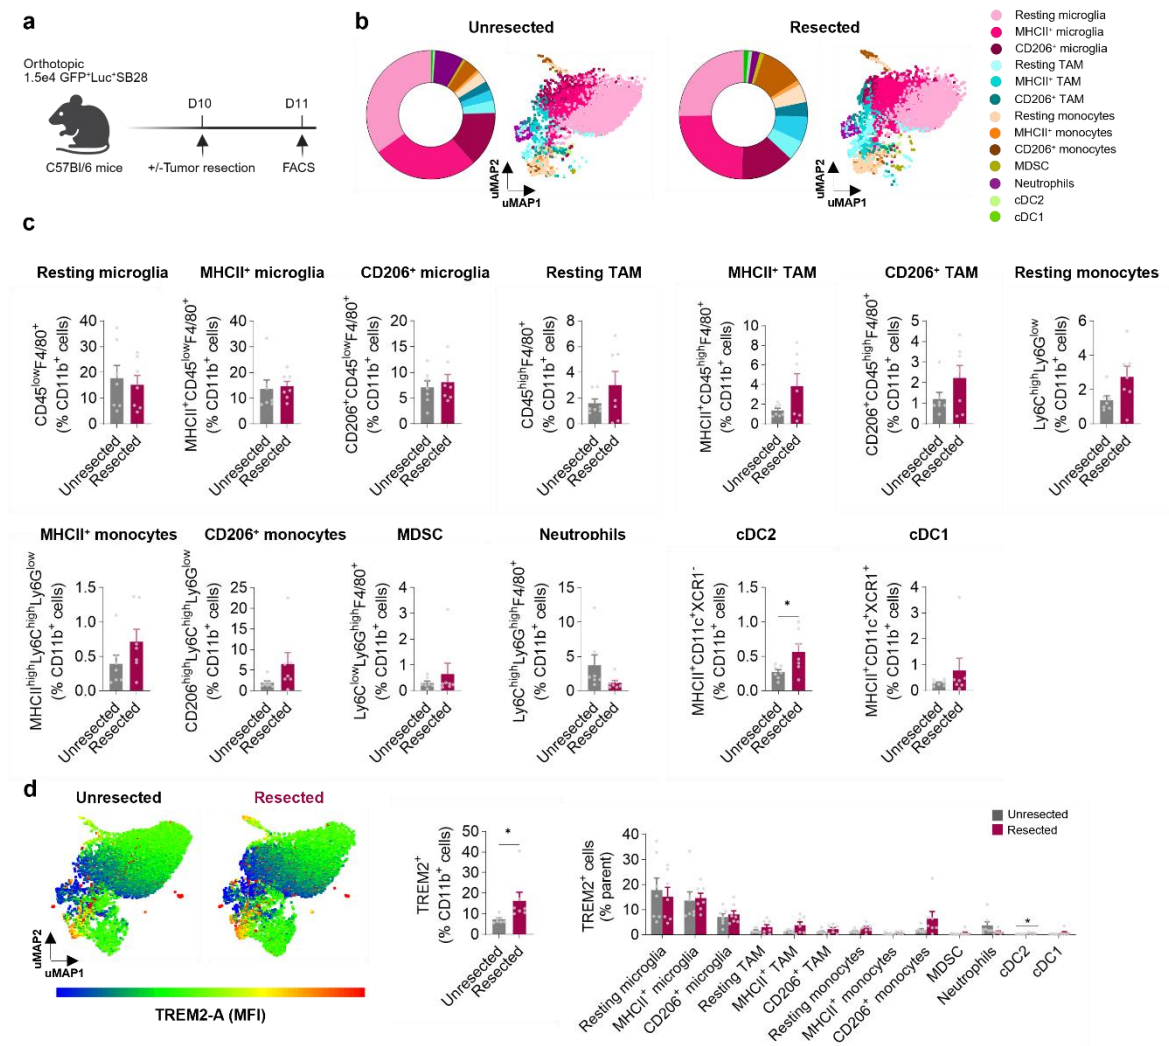

**Supplemental figure 5. Tumor resection induces acute myeloid remodeling and TREM2 upregulation in orthotopic SB28 model.** (a) Experimental scheme comparing unresected and resected orthotopic SB28 tumors on TME at day 11 (D11) by flow cytometry. (b) Uniform manifold approximation and projection (UMAP) visualization of flow cytometry analysis of CD45<sup>+</sup>CD11b<sup>+</sup> myeloid populations and donut charts showing the distribution of major myeloid subsets in unresected and resected SB28 tumors. (c) Frequency of microglial, dendritic cell (cDC1 and cDC2), myeloid-derived suppressor cells (MDSC), neutrophil, tumor-associated macrophage (TAM), and monocyte subsets in unresected vs resected SB28 tumors at D11, shown as percentage of CD11b<sup>+</sup> cells. (d) UMAP visualization of flow cytometry analysis of CD45<sup>+</sup>CD11b<sup>+</sup> myeloid population colored by TREM2 expression intensity in unresected vs resected SB28 tumors at D11 (left panel). Frequency of TREM2<sup>+</sup> cells among total CD11b<sup>+</sup> myeloid cells in unresected vs resected SB28 tumors at D11, and distribution of TREM2 expression across individual myeloid subsets (right panel). Data are shown as mean ± SEM with individual data points representing mice (n=7 per group). Statistical analyses were performed using unpaired two-tailed t-tests. \*p < 0.05, \*\*p < 0.01, \*\*\*p < 0.001.



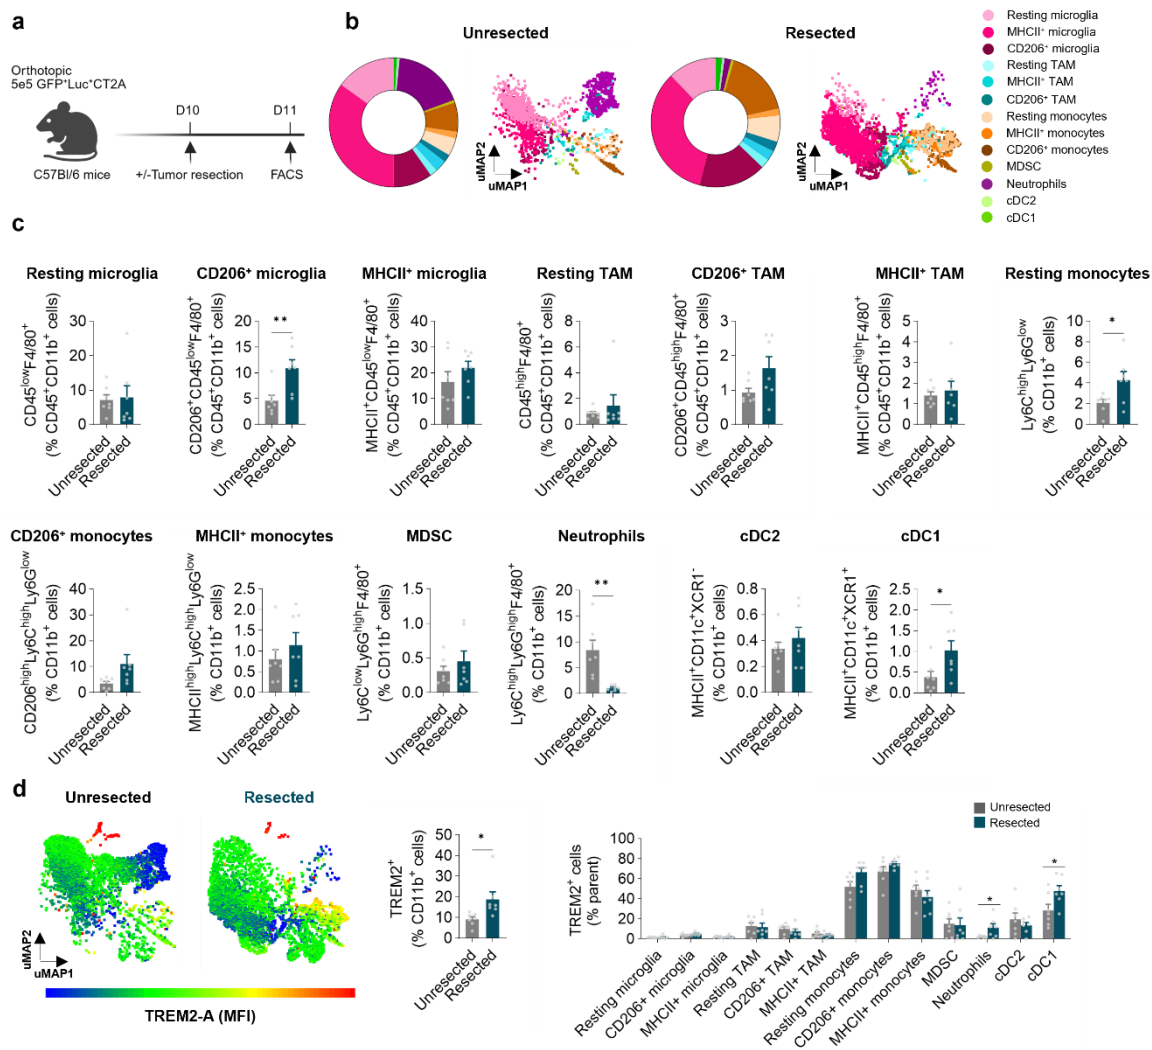

**Supplemental figure 6. Tumor resection induces acute myeloid remodeling and TREM2 upregulation in orthotopic CT2A model.** (a) Experimental scheme comparing unresected and resected orthotopic CT2A tumors on TME at day 11 (D11) by flow cytometry. (b) Uniform manifold approximation and projection (UMAP) visualization of flow cytometry analysis of CD45<sup>+</sup>CD11b<sup>+</sup> myeloid populations and donut charts showing the distribution of major myeloid subsets in unresected and resected CT2A tumors. (c) Frequency of microglial, dendritic cell (cDC1 and cDC2), myeloid-derived suppressor cells (MDSC), neutrophil, tumor-associated macrophage (TAM), and monocyte subsets in unresected vs resected CT2A tumors at D11, shown as percentage of CD11b<sup>+</sup> cells. (d) UMAP visualization of flow cytometry analysis of CD45<sup>+</sup>CD11b<sup>+</sup> myeloid population colored by TREM2 expression intensity in unresected vs resected CT2A tumors at D11 (left panel). Frequency of TREM2<sup>+</sup> cells among total CD11b<sup>+</sup> myeloid cells in unresected vs resected CT2A tumors at D11, and distribution of TREM2 expression across individual myeloid subsets (right panel). Data are shown as mean  $\pm$  SEM with individual data points representing mice (n=7 per group). Statistical analyses were performed using unpaired two-tailed t-tests. \*p < 0.05, \*\*p < 0.01, \*\*\*p < 0.001.

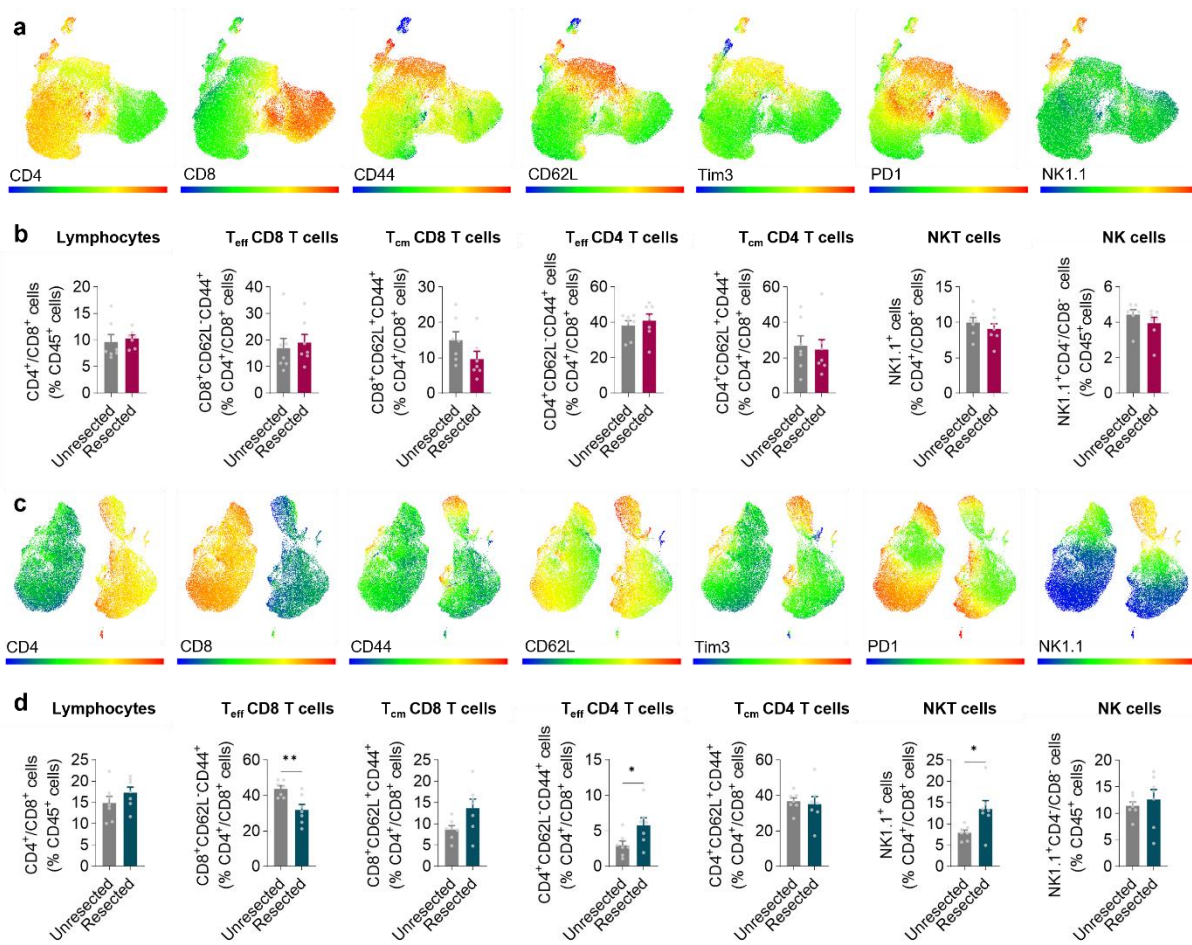

**Supplemental figure 7. Expression intensity of T-cell markers in resected and unresected glioblastomas in lymphoid cell populations ten days after resection in SB28 and CT2A tumors.** (a/c) Uniform manifold approximation and projection (UMAP) visualization of lymphoid cell populations gated as CD45<sup>+</sup>CD3<sup>+</sup> cells from SB28 (a) and CT2A (c) tumors. Each dot represents an individual cell colored according to expression intensity of indicated markers (CD4, CD8, CD44, CD62L, Tim3, PD1 and NK1.1). (c) Quantification of total lymphocytes, effector ( $T_{eff}$ ) and central memory ( $T_{cm}$ ) CD4,  $T_{eff}$  and  $T_{cm}$  CD8, NKT cells and NK cells in unresected vs resected SB28 (b) and CT2A (d) tumors. Data are shown as mean  $\pm$  SEM with individual data points representing mice (n=6-7 per group). Statistical analyses were performed using unpaired two-tailed t-tests. \*p < 0.05, \*\*p < 0.01.





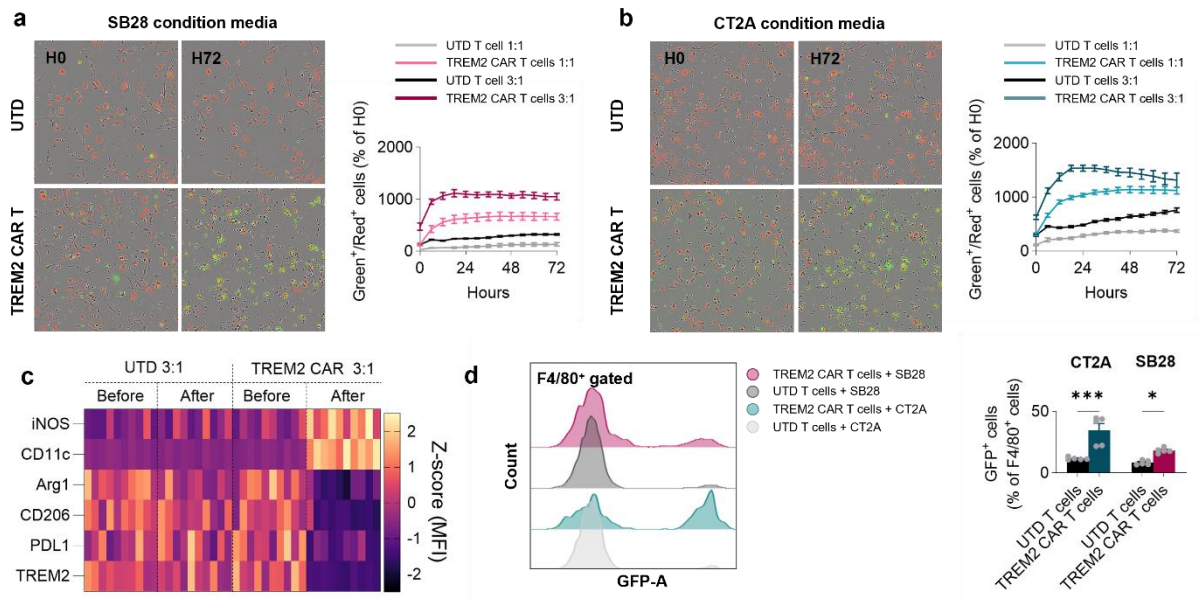

**Supplemental Figure 9. Anti TREM2 CAR T cells eliminate and reprogram GBM-conditioned macrophages *in vitro*.** (a-b) Representative IncuCyte images of bone marrow-derived macrophages (BMDMs) pre-exposed to SB28- (a) or CT2A- (b) conditioned media (CM) and co-cultured with untransduced (UTD) T cells or anti-TREM2 CAR T cells at an effector-to-target (E:T) ratio of 1:1 or 3:1. Images are shown at the start of co-culture (H0) and after 72 h (H72). BMDMs are labeled with CellTrace Yellow, and dead cells are detected using Cytotox Green. Quantification of macrophage killing over time, expressed as the normalized area of double-positive (CellTrace Yellow<sup>+</sup>/Cytotox Green<sup>+</sup>) signal relative to H0, for SB28-CM (a) and CT2A-CM (b)-conditioned BMDMs co-cultured with UTD or anti-TREM2 CAR T cells (n=3-6 technical replicates per condition). (c) Heatmap showing z-scored mean fluorescence intensity (MFI) of indicated markers in F4/80<sup>+</sup> BMDMs before and after co-culture with UTD or anti-TREM2 CAR T cells (E:T 3:1). (d) Flow cytometry analysis of F4/80<sup>+</sup> BMDM showing GFP<sup>+</sup> target uptake following a 24 h co-culture with GFP<sup>+</sup>GD2<sup>+</sup> SB28 or CT2A tumor cells after prior exposure to UTD or TREM2 CAR T cells (3:1 E:T ratio). Quantification of the percentage of GFP<sup>+</sup> cells within the F4/80<sup>+</sup> population is shown on the right (n=independent replicates; one-way ANOVA). Data are shown as mean  $\pm$  SEM. \*p < 0.05, \*\*p < 0.01, \*\*\*p < 0.001.

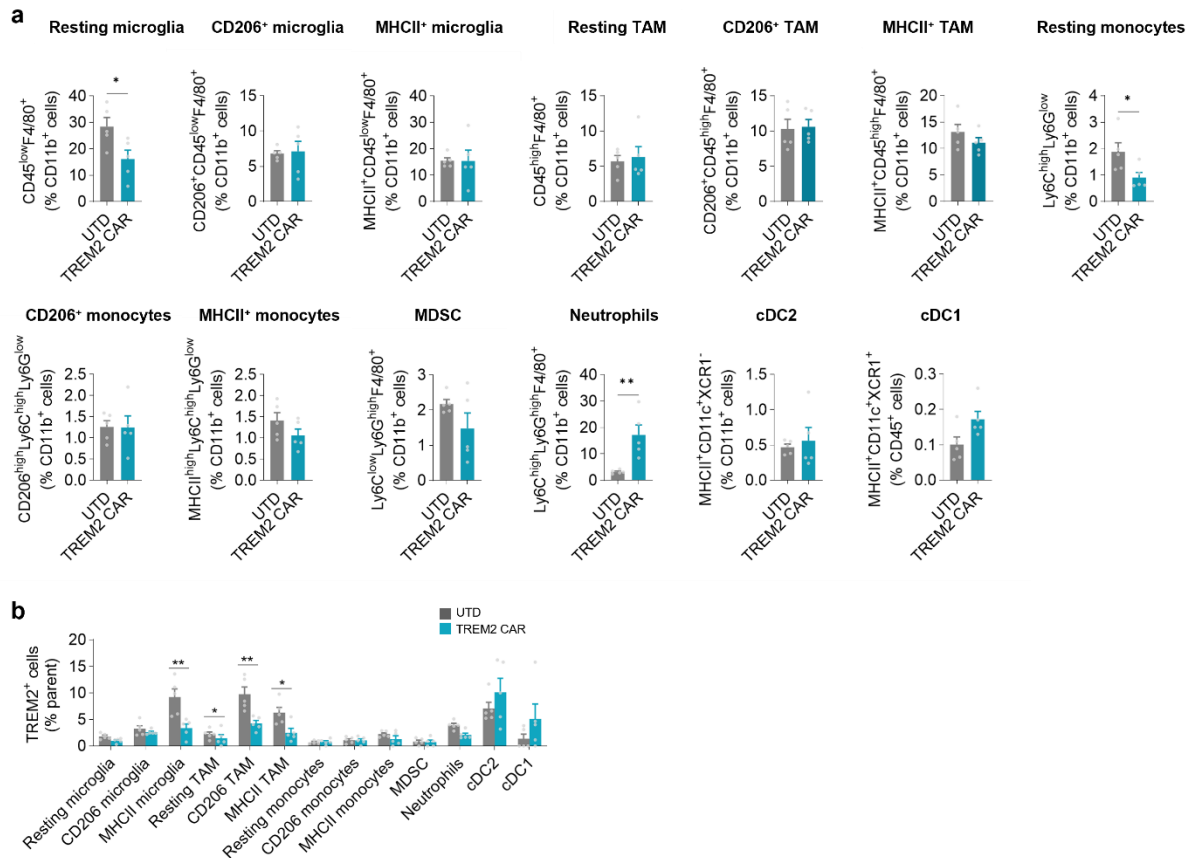

**Supplemental figure 10. TREM2 CAR T cells deplete TREM2<sup>+</sup> myeloid cells and recruit pro-inflammatory neutrophils *in vivo*.** (a) Frequency of microglial, dendritic cell (cDC1 and cDC2), myeloid-derived suppressor cells (MDSC), neutrophil, tumor-associated macrophage (TAM), and monocyte subsets in resected SB28 tumors treated with UTD or anti-TREM2 CAR T cells (n = 7 mice per group) shown as percentage of CD45<sup>+</sup>CD11b<sup>+</sup> cells. (b) Distribution of TREM2 expression across individual myeloid subsets in resected SB28 tumors treated with UTD or anti-TREM2 CAR T cells (n=7 mice per group). Data are shown as mean ± SEM. Unpaired two-tailed t-tests were used. \*p < 0.05, \*\*p < 0.01.

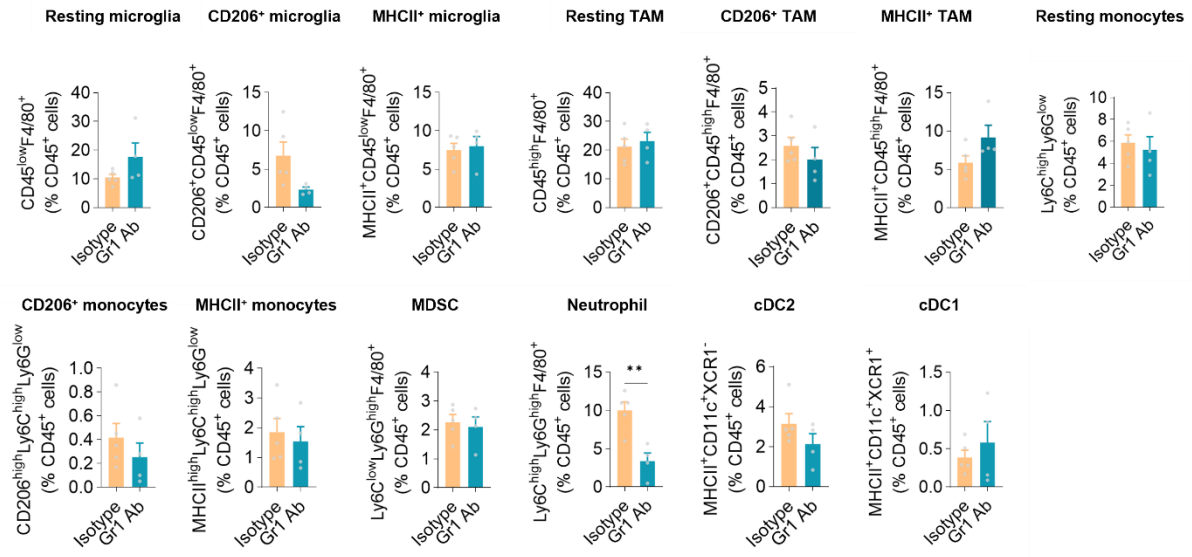

**Supplemental figure 11. Impact of neutrophil depletion on myeloid cell compartment composition following TREM2 CAR T-cell therapy.** Frequency of microglial, dendritic cell (cDC1 and cDC2), myeloid-derived suppressor cells (MDSC), neutrophil, tumor-associated macrophage (TAM), and monocyte subsets in isotype *versus* anti-Gr1 antibody (Ab)-treated SB28-bearing mice treated with TREM2 CAR T cells shown as percentage of CD45<sup>+</sup> cells (n=4-5 mice per group). Data are shown as mean  $\pm$  SEM. Unpaired two-tailed t-tests were used. \*p < 0.05, \*\*p < 0.01.

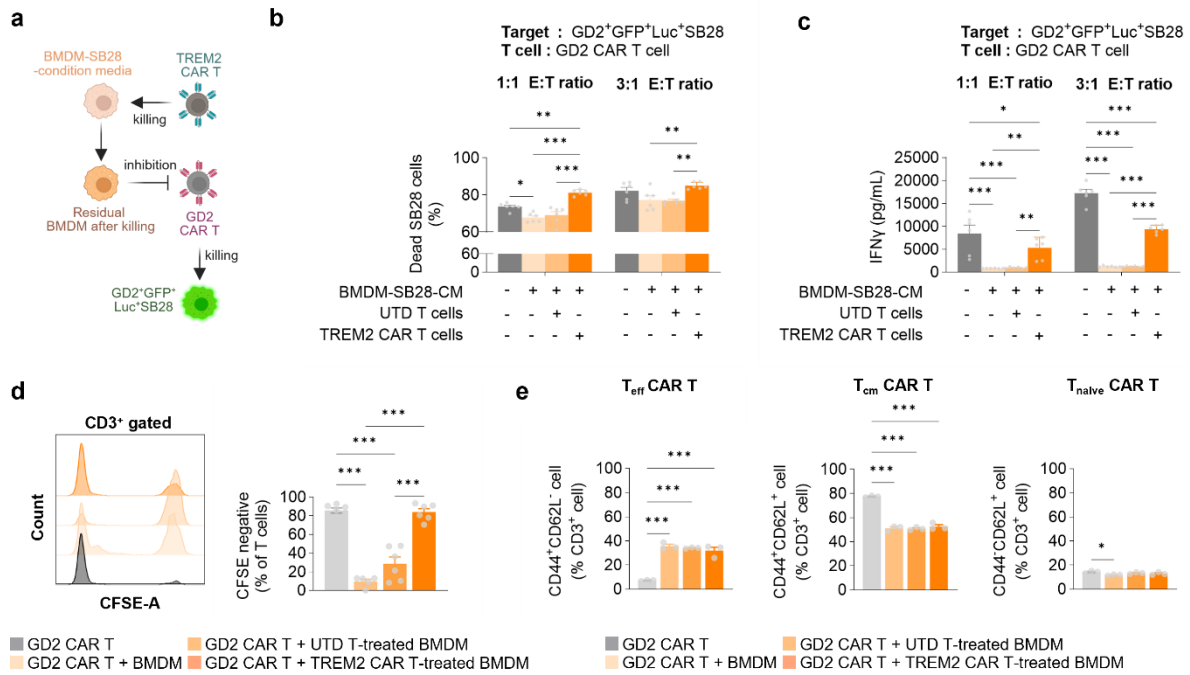

**Supplemental figure 12. Impact of TREM2 CAR T cell-conditioned macrophages on GD2-CAR T cell activity.** (a) Experimental scheme: bone marrow-derived macrophages (BMDM) were pretreated with conditioned medium from SB28 cells (SB28 CM), then exposed to either untransduced (UTD) or TREM2 CAR T cells before co-culture with GD2-CAR T cells and SB28 tumor cells. (b) Percentage of dead SB28 tumor cells after co-culture with GD2-CAR T cells at effector:target ratios of 1:1 and 3:1, in the presence of BMDM pretreated with UTD or TREM2 CAR T cells (n=6 replicates from two independent experiments, two-way ANOVA with Bonferroni correction). (b) Quantification of IFN- $\gamma$  secretion (pg/mL) by GD2-CAR T cells measured from the same co-culture experiments shown in (a) (n=6 replicates from two independent experiments, two-way ANOVA with Bonferroni correction). (c) Left: representative histograms of CFSE dilution in GD2 CAR T cells after co-culture, showing proliferative capacity. Right: Quantification of CFSE<sup>+</sup> GD2 CAR T cells expressed as percentage of CD3<sup>+</sup> T cells (n=6 replicates from two independent experiments, one-way ANOVA with Bonferroni correction). (d) Frequency of effector T cells (T<sub>eff</sub>, CD44<sup>+</sup>CD62L<sup>-</sup>), central memory T cells (T<sub>cm</sub>, CD44<sup>+</sup>CD62L<sup>+</sup>), and naïve T cells (CD44<sup>-</sup>CD62L<sup>+</sup>) among GD2 CAR T cells in co-culture with UTD or TREM2 CAR T cell-pretreated BMDM (n=3 replicates, one-way ANOVA with Bonferroni correction). Data are shown as mean  $\pm$  SEM. \*p < 0.05, \*\*p < 0.01, \*\*\*p < 0.001.



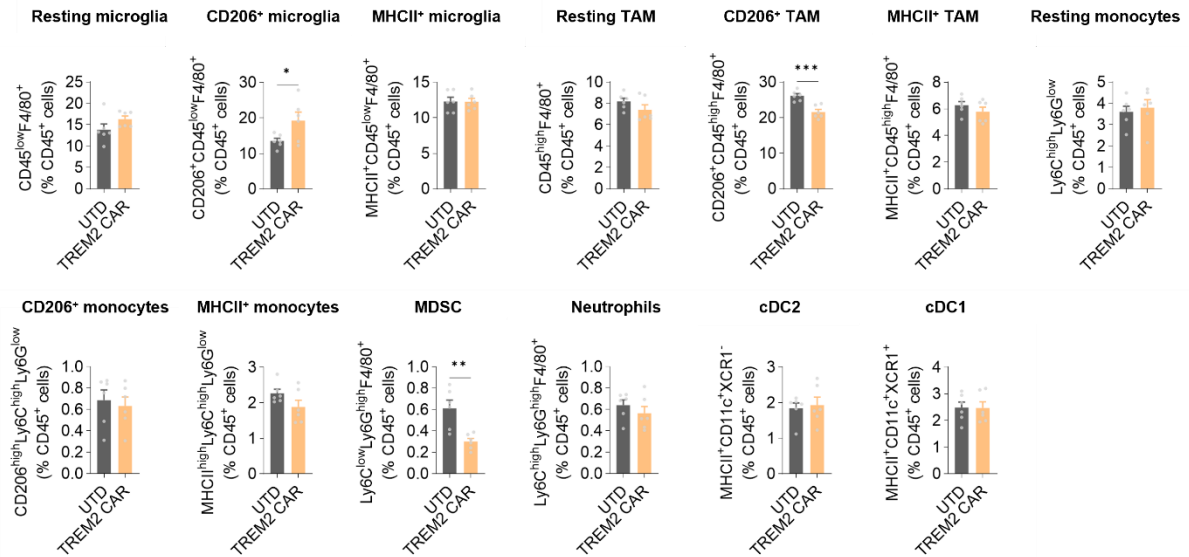

**Supplemental figure 13. Myeloid cell remodeling following combined TREM2 and GD2 CAR T-cell therapy in SB28 glioblastoma.** Frequency of microglial, dendritic cell (cDC1 and cDC2), myeloid-derived suppressor cells (MDSC), neutrophil, tumor-associated macrophage (TAM), and monocyte subsets in SB28 tumors treated with GD2 CAR T cells combined with untransduced (UTD) or TREM2 CAR T cells shown as percentage of CD45<sup>+</sup> cells (n=6 mice per group). Data are shown as mean  $\pm$  SEM. Unpaired two-tailed t-tests were used. \*p < 0.05, \*\*p < 0.01.

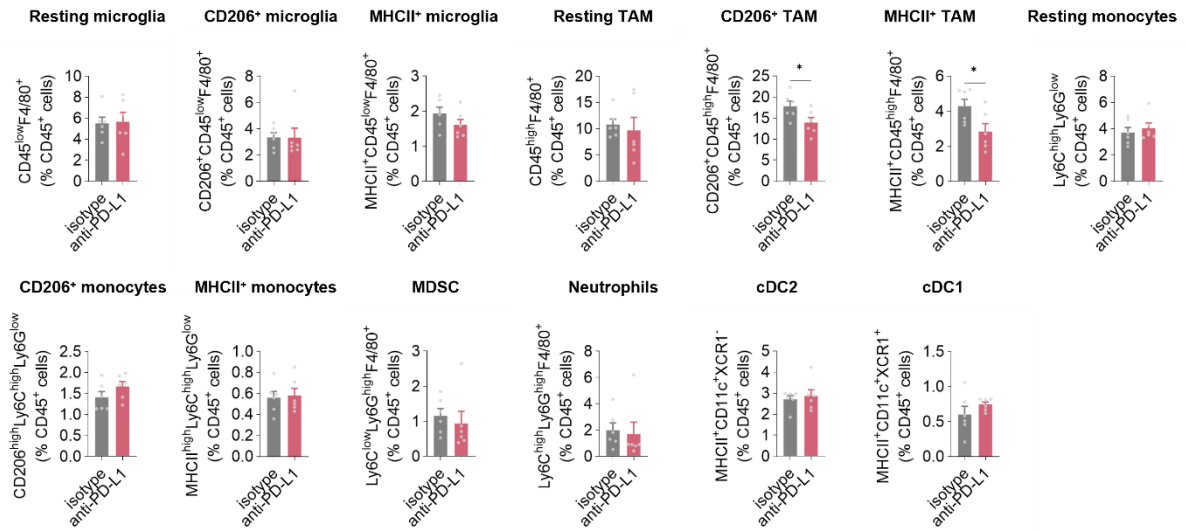

**Supplemental figure 14. Effect of locoregional injection of GD2- and TREM2-targeting CAR T cells combined with anti-PD-L1 in SB28 model on TME.** Frequency of microglial, dendritic cell (cDC1 and cDC2), myeloid-derived suppressor cells (MDSC), neutrophil, tumor-associated macrophage (TAM), and monocyte subsets in SB28 tumors treated with TREM2/GD2 CAR T cell combined with antiPD-L1 antibody or isotype control shown as percentage of CD45<sup>+</sup> cells (n=6 mice per group). Data are shown as mean  $\pm$  SEM. Unpaired two-tailed t-tests were used. \*p < 0.05.

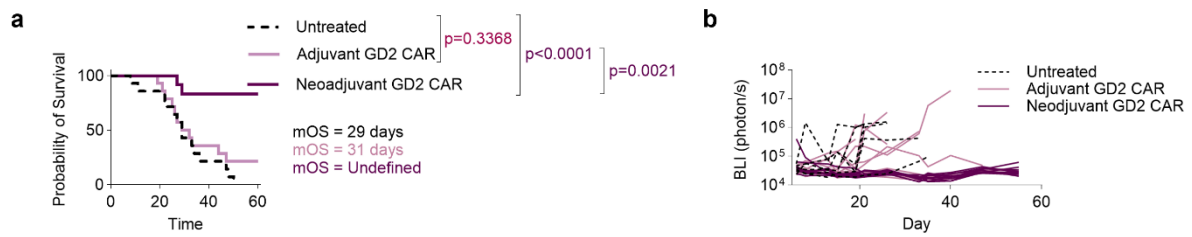

**Supplemental figure 15. Neoadjuvant GD2 CAR T cell therapy enhances tumor control and prolongs survival in CT2A model.** (a) Kaplan–Meier survival analysis of CT2A-bearing mice receiving resection alone, adjuvant GD2 CAR T cells, or neoadjuvant GD2 CAR T cells (log-rank test). mOS=median of survival. (b) Longitudinal bioluminescence imaging (BLI) quantification of tumor growth in the three treatment groups (n = 12-17 mice per group).

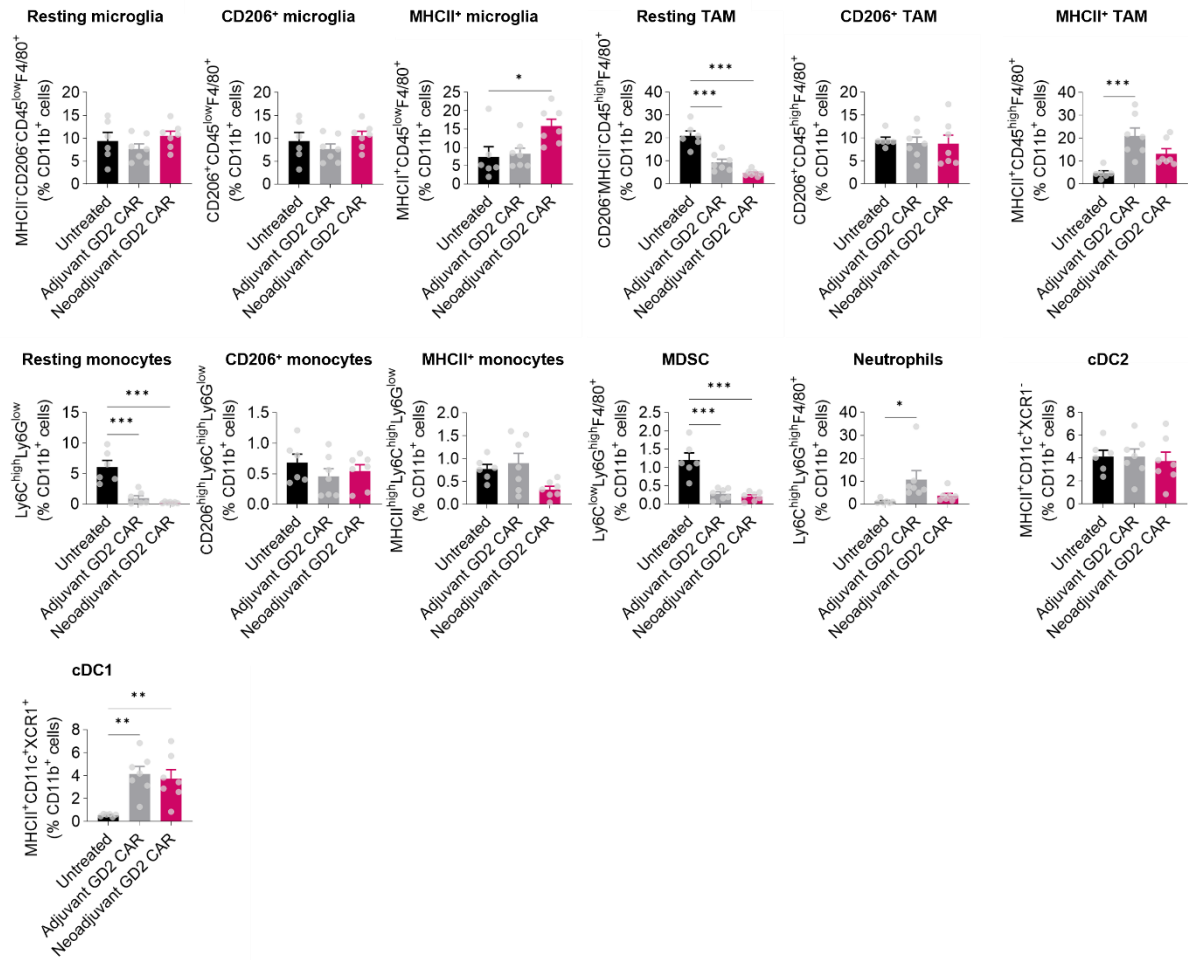

**Supplemental figure 16. Myeloid cell compartment remodeling following neoadjuvant versus adjuvant GD2 CAR T-cell therapy in the SB28 model.** Frequency of microglial, dendritic cell (cDC1 and cDC2), myeloid-derived suppressor cells (MDSC), neutrophil, tumor-associated macrophage (TAM), and monocyte of resected SB28-bearing mice treated or not with adjuvant or neoadjuvant GD2 CAR T cells. Data are shown as mean  $\pm$  SEM (n=6-7 per condition, unpaired t-test). \*p<0.05, \*\*p<0.01, \*\*\*p<0.001.

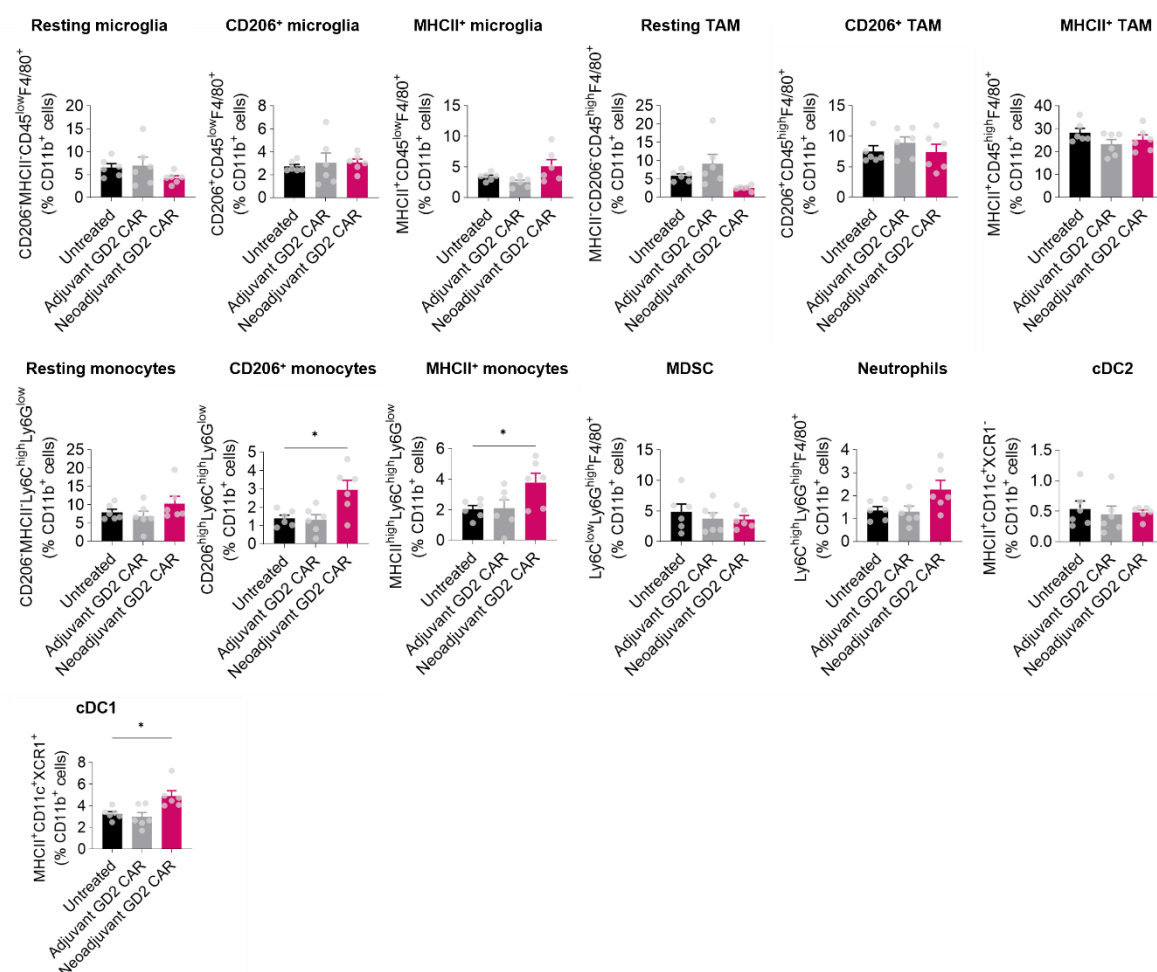

**Supplemental figure 17. Myeloid cell compartment remodeling following neoadjuvant versus adjuvant GD2 CAR T-cell therapy in the CT2A model.** Frequency of microglial, dendritic cell (cDC1 and cDC2), myeloid-derived suppressor cells (MDSC), neutrophil, tumor-associated macrophage (TAM), and monocyte of resected CT2A-bearing mice treated or not with adjuvant or neoadjuvant GD2 CAR T cells. Data are shown as mean  $\pm$  SEM (n=6 per condition, unpaired t-test). \*p<0.05, \*\*p<0.01, \*\*\*p<0.001.



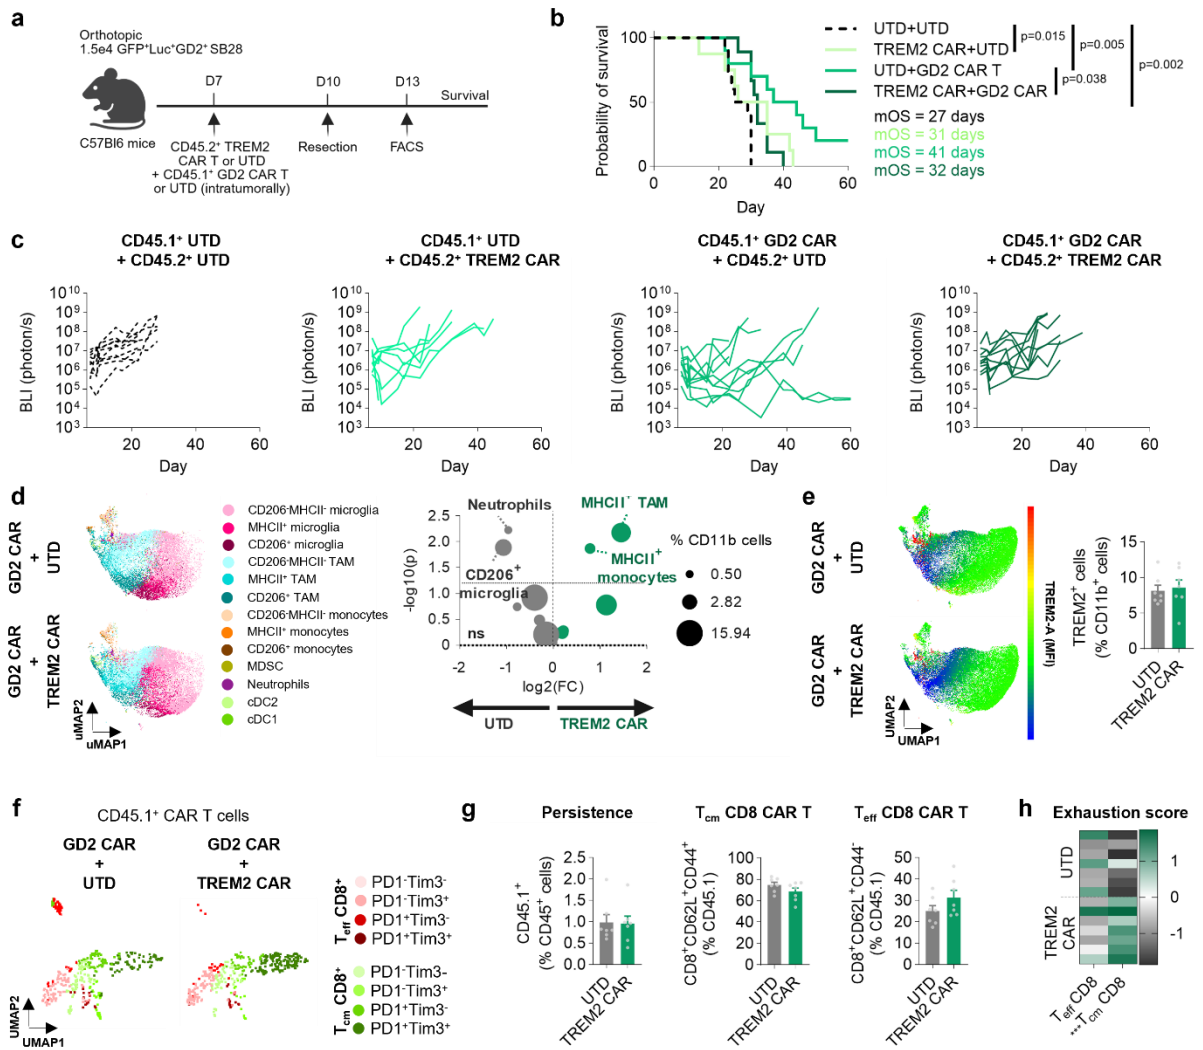

**Supplemental figure 18. Effect of combining TREM2 and GD2 CAR T cells as neoadjuvant therapy in SB28 GBM.** (a) Experimental scheme of SB28-bearing mice treated with two T-cell populations ( $5 \times 10^5$  each): untransduced (UTD)+UTD, antiTREM2 CAR+UTD, UTD+antiGD2 CAR, or antiTREM2 CAR+antiGD2 delivered intratumorally as neoadjuvant on day 7 and resected on day 10. (b) Kaplan–Meier survival analysis of mice receiving the indicated neoadjuvant regimens ( $n=8-10$  per group; log-rank test). mOS=median of survival. (c) Longitudinal bioluminescence imaging (BLI) quantification of tumor growth in individual mice from each treatment group. (d) Uniform manifold approximation and projection (UMAP) visualization of tumor infiltrating CD11b<sup>+</sup>CD45<sup>+</sup> myeloid cells three days after resection in the UTD+GD2 CAR and TREM2 CAR+GD2 neoadjuvant treatments (left). Volcano plot (right) showing log2 fold-changes (log2(FC)) and mean frequencies of major myeloid cell subsets in TREM2 CAR or UTD T cell-treated mice receiving GD2 CAR T cells. (e) Left: UMAP visualization and quantification of TREM2 expression among CD11b<sup>+</sup>CD45<sup>+</sup> myeloid cells three days post-resection in TREM2 CAR or UTD T cell-treated mice receiving GD2 CAR T cells. Right: flow cytometry quantification of TREM2<sup>+</sup> cells among CD11b<sup>+</sup> cells in TREM2 CAR or UTD T cell-treated mice receiving GD2 CAR T cells ( $n=7$ , unpaired two-tailed t-test). (f) UMAP of tumor-infiltrating CD8<sup>+</sup>CD45.1<sup>+</sup> GD2 CAR T cells colored by manually annotated clusters following TREM2 CAR or UTD T cell treatment. (g) Flow cytometry quantification of CD45.1<sup>+</sup> CAR T cells among CD4<sup>+</sup>/CD8<sup>+</sup>CD45<sup>+</sup> cells and quantification of T<sub>eff</sub> CD8

(CD8<sup>+</sup>CD62L<sup>-</sup>CD44<sup>+</sup>) and T<sub>cm</sub> CD8 (CD8<sup>+</sup>CD62L<sup>+</sup>CD44<sup>+</sup>) among CD45.1<sup>+</sup> GD2 CAR T cells in tumors of antiGD2 CAR T cells treated in combination with UTD or antiTREM2 CAR T cells (n=7, unpaired two-tailed t-test). **(h)** Heatmap of exhaustion score (z-score; composite of exhaustion-associated markers, see Methods) for T<sub>eff</sub> and T<sub>cm</sub> CD8<sup>+</sup>CD45.1<sup>+</sup> GD2 CAR T cells (n=7 mice/condition, unpaired t-test). Data are shown as mean ± SEM. \*\*\*p<0.001.

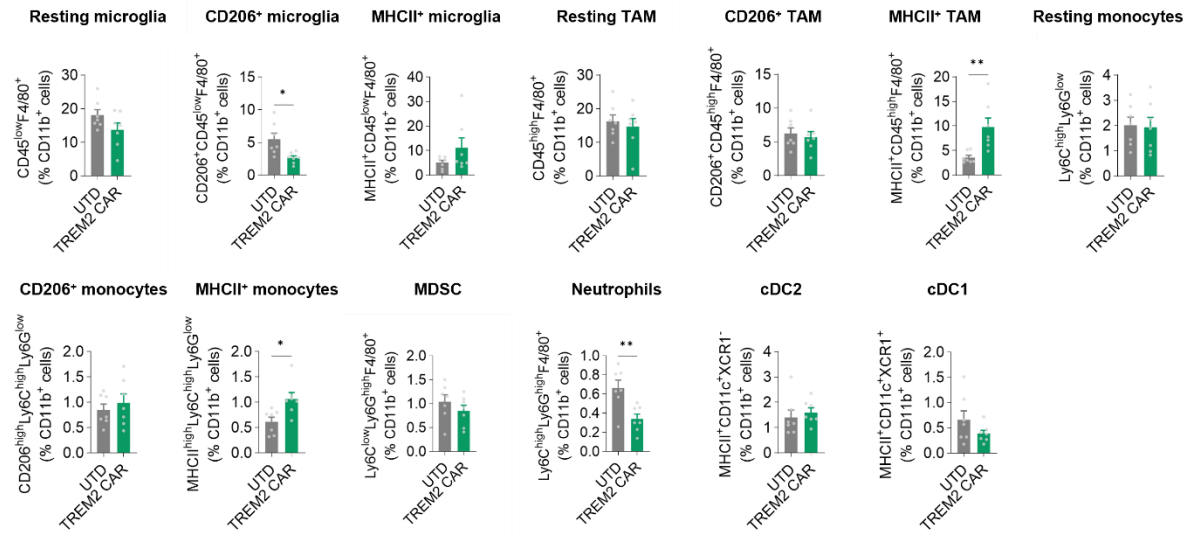

**Supplemental figure 19. Effect of co-injection of TREM2 and GD2 CAR T cells as neoadjuvant on the TME in the SB28 model.** Frequency of microglial, dendritic cell (cDC1 and cDC2), myeloid-derived suppressor cells (MDSC), neutrophil, tumor-associated macrophage (TAM), and monocyte of GD2 CAR T cell-treated mice bearing SB28 tumor receiving untransduced (UTD) or TREM2 CAR T cells as neoadjuvant (day 7, three days before resection). Data are shown as mean  $\pm$  SEM (n=7/condition, unpaired t-test). \*p<0.05, \*\*p<0.01.

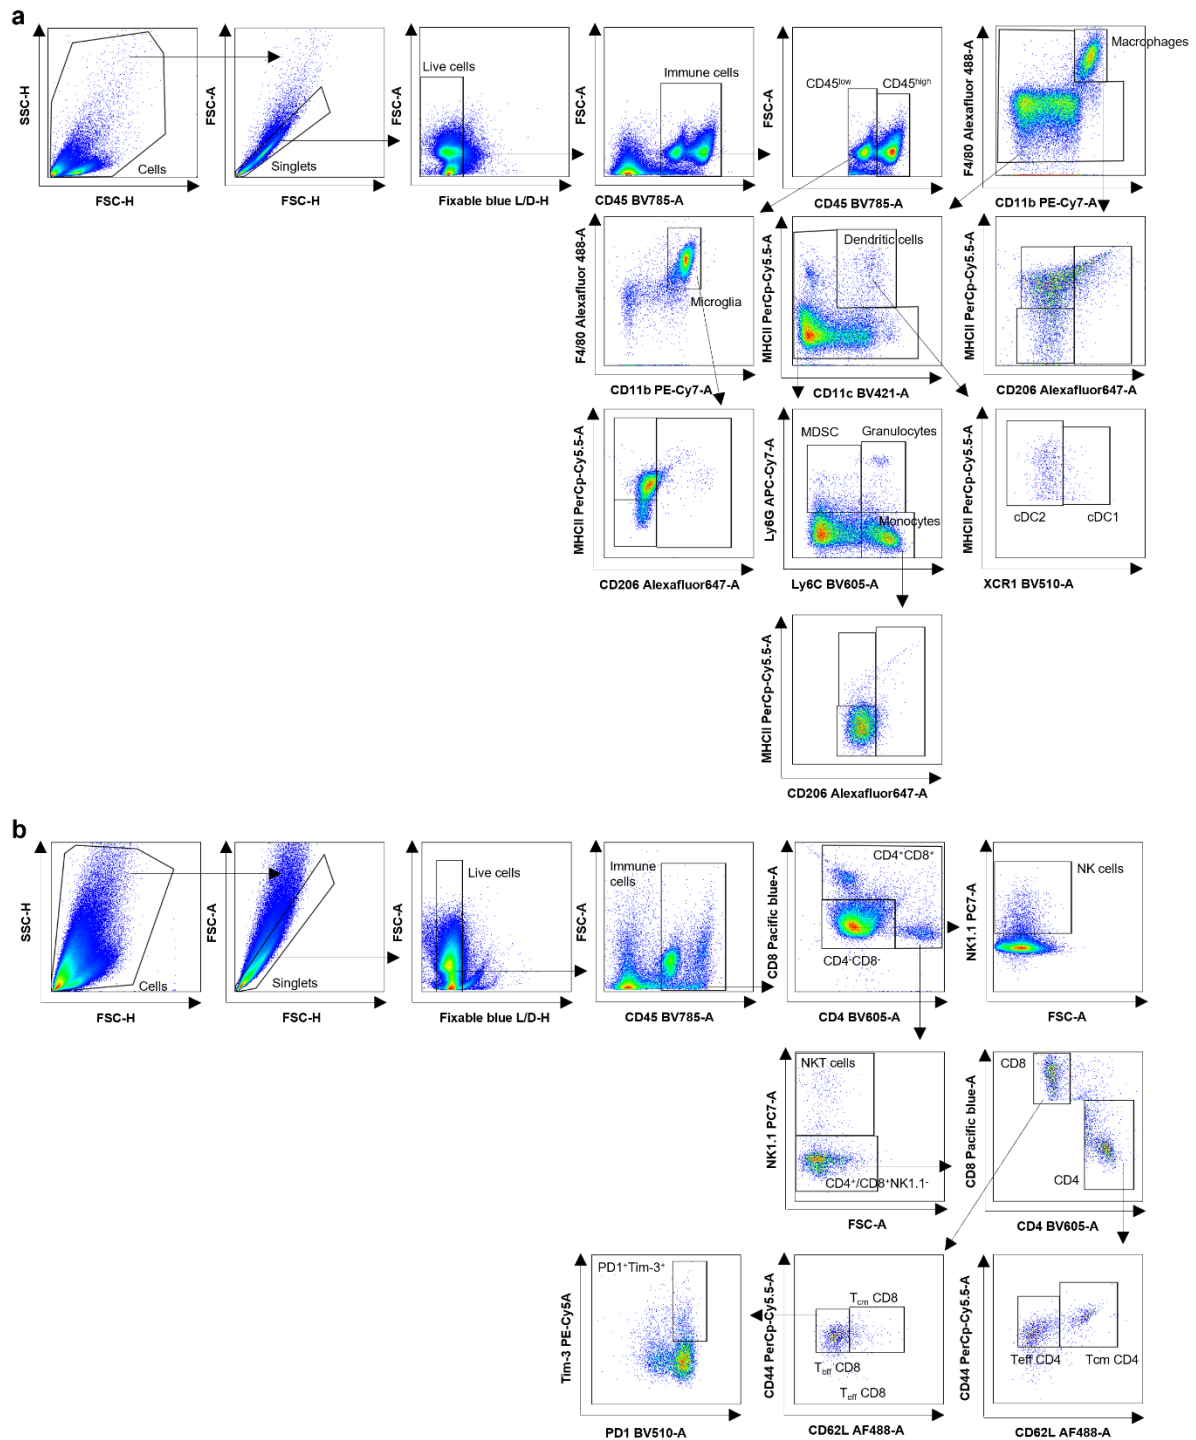

**Supplemental Figure 20. Gating strategy for flow cytometry analysis of myeloid and lymphoid cell populations. (a) Representative gating strategy for myeloid cell subsets. (b) Representative gating strategy for lymphoid cell subsets.**

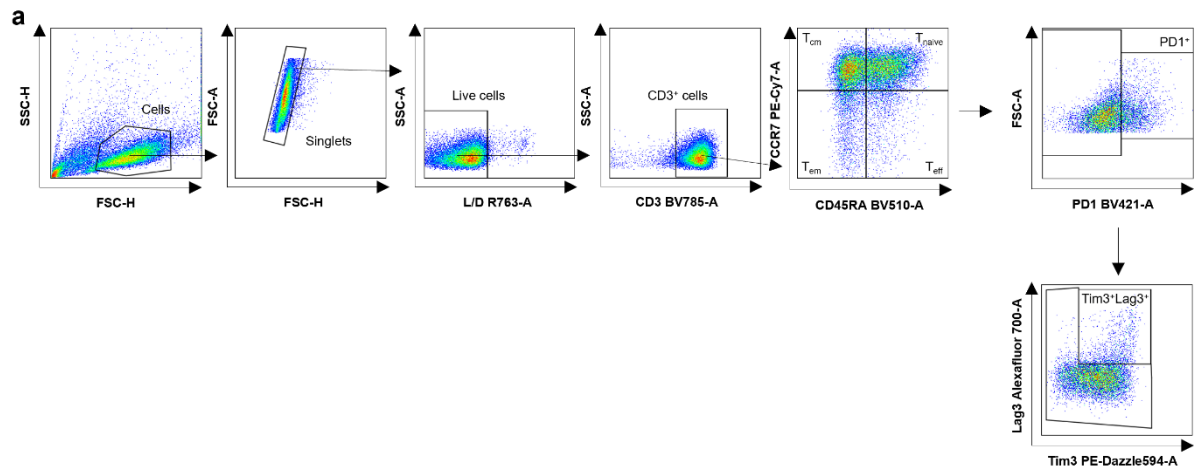

**Supplementary figure 21. Gating strategy for flow analysis of human lymphoid subsets.**  
Representative gating strategy for human lymphoid cell subsets.



| Antigen      | Fluorochrome   | Reactivity  | Clone       | Provider       | Reference     | Dilution used | Validation                                                                                                                                                                                                                                                                                                                                                                                        |
|--------------|----------------|-------------|-------------|----------------|---------------|---------------|---------------------------------------------------------------------------------------------------------------------------------------------------------------------------------------------------------------------------------------------------------------------------------------------------------------------------------------------------------------------------------------------------|
| CD16/32      | Unconjugated   | Mouse       | 93          | Biologend      | 101301        | 1 : 100       | <a href="https://www.biologend.com/en-us/products/purified-anti-mouse-cd16-32-antibody-190#productCertificate">https://www.biologend.com/en-us/products/purified-anti-mouse-cd16-32-antibody-190#productCertificate</a>                                                                                                                                                                           |
| CD45         | BV785          | Mouse       | 30-F11      | Biologend      | 103149        | 1 : 100       | <a href="https://www.biologend.com/en-us/products/brilliant-violet-785-anti-mouse-cd45-antibody-10636">https://www.biologend.com/en-us/products/brilliant-violet-785-anti-mouse-cd45-antibody-10636</a>                                                                                                                                                                                           |
| CD11b        | PE-Cy7         | Mouse/Human | M1/70       | Biologend      | 101216        | 1 : 100       | <a href="https://www.biologend.com/en-us/products/pe-cyanine7-anti-mouse-human-cd11b-antibody-1921">https://www.biologend.com/en-us/products/pe-cyanine7-anti-mouse-human-cd11b-antibody-1921</a>                                                                                                                                                                                                 |
| F4/80        | Alexafluor 488 | Mouse       | BM8         | Biologend      | 123120        | 1 : 100       | <a href="https://www.biologend.com/en-us/products/alexa-fluor-488-anti-mouse-f4-80-antibody-4073">https://www.biologend.com/en-us/products/alexa-fluor-488-anti-mouse-f4-80-antibody-4073</a>                                                                                                                                                                                                     |
| I-A/I-E      | PerCp/Cy5.5    | Mouse       | M5/114.15.2 | Biologend      | 107626        | 1 : 100       | <a href="https://www.biologend.com/en-us/products/percp-cyanine5-5-anti-mouse-i-a-i-e-antibody-4282">https://www.biologend.com/en-us/products/percp-cyanine5-5-anti-mouse-i-a-i-e-antibody-4282</a>                                                                                                                                                                                               |
| CD11c        | BV421          | Mouse       | N418        | Biologend      | 117330        | 1 : 100       | <a href="https://www.biologend.com/en-us/products/brilliant-violet-421-anti-mouse-cd11c-antibody-7149">https://www.biologend.com/en-us/products/brilliant-violet-421-anti-mouse-cd11c-antibody-7149</a>                                                                                                                                                                                           |
| CD206        | Alexafluor 647 | Mouse       | C068C2      | Biologend      | 141712        | 1 : 50        | <a href="https://www.biologend.com/en-us/products/alexa-fluor-647-anti-mouse-cd206-mm-antibody-7427">https://www.biologend.com/en-us/products/alexa-fluor-647-anti-mouse-cd206-mm-antibody-7427</a>                                                                                                                                                                                               |
| Ly6C         | BV605          | Mouse       | HK1.4       | Biologend      | 128036        | 1 : 100       | <a href="https://www.biologend.com/en-us/products/brilliant-violet-605-anti-mouse-ly-6c-antibody-8727">https://www.biologend.com/en-us/products/brilliant-violet-605-anti-mouse-ly-6c-antibody-8727</a>                                                                                                                                                                                           |
| Ly6G         | APC-Cy7        | Mouse       | 1A8         | Biologend      | 127624        | 1 : 100       | <a href="https://www.biologend.com/en-us/products/apc-cyanine7-anti-mouse-ly-6g-antibody-6755">https://www.biologend.com/en-us/products/apc-cyanine7-anti-mouse-ly-6g-antibody-6755</a>                                                                                                                                                                                                           |
| XCR1         | BV510          | Mouse       | ZET         | Biologend      | 148218        | 1 : 100       | <a href="https://www.biologend.com/en-us/products/brilliant-violet-510-anti-mouse-rat-xcr1-antibody-10751">https://www.biologend.com/en-us/products/brilliant-violet-510-anti-mouse-rat-xcr1-antibody-10751</a>                                                                                                                                                                                   |
| TREM2        | PE             | Mouse       | 6E9         | Biologend      | 824805        | 1 : 100       | <a href="https://www.biologend.com/en-us/products/pe-anti-trem-2-antibody-22902">https://www.biologend.com/en-us/products/pe-anti-trem-2-antibody-22902</a>                                                                                                                                                                                                                                       |
| CD3          | APC-Cy7        | Mouse       | 17A2        | Biologend      | 100222        | 1 : 100       | <a href="https://www.biologend.com/en-us/products/apc-cyanine7-anti-mouse-cd3-antibody-6068">https://www.biologend.com/en-us/products/apc-cyanine7-anti-mouse-cd3-antibody-6068</a>                                                                                                                                                                                                               |
| CD8          | Pacific Blue   | Mouse       | 53-6.7      | Biologend      | 100725        | 1 : 100       | <a href="https://www.biologend.com/en-us/products/pacific-blue-anti-mouse-cd8a-antibody-2856">https://www.biologend.com/en-us/products/pacific-blue-anti-mouse-cd8a-antibody-2856</a>                                                                                                                                                                                                             |
| CD4          | BV605          | Mouse       | GK1.5       | Biologend      | 100451        | 1 : 100       | <a href="https://www.biologend.com/en-us/products/brilliant-violet-605-anti-mouse-cd4-antibody-10708">https://www.biologend.com/en-us/products/brilliant-violet-605-anti-mouse-cd4-antibody-10708</a>                                                                                                                                                                                             |
| NK1.1        | PC7            | Mouse       | PK136       | Biologend      | 108714        | 1 : 100       | <a href="https://www.biologend.com/en-us/products/pe-cyanine7-anti-mouse-nk-1-1-antibody-2840">https://www.biologend.com/en-us/products/pe-cyanine7-anti-mouse-nk-1-1-antibody-2840</a>                                                                                                                                                                                                           |
| CD44         | PerCp          | Mouse/Human | IM7         | Biologend      | 103036        | 1 : 100       | <a href="https://www.biologend.com/en-us/products/percp-anti-mouse-human-cd44-antibody-6895">https://www.biologend.com/en-us/products/percp-anti-mouse-human-cd44-antibody-6895</a>                                                                                                                                                                                                               |
| CD62L        | Alexafluor 488 | Mouse       | MEL-14      | Biologend      | 104420        | 1 : 100       | <a href="https://www.biologend.com/en-us/products/alexa-fluor-488-anti-mouse-cd62l-antibody-3115">https://www.biologend.com/en-us/products/alexa-fluor-488-anti-mouse-cd62l-antibody-3115</a>                                                                                                                                                                                                     |
| PD-1         | BV510          | Mouse       | 29F.1A12    | Biologend      | 135241        | 1 : 100       | <a href="https://www.biologend.com/en-us/products/brilliant-violet-510-anti-mouse-cd279-pd-1-antibody-14923">https://www.biologend.com/en-us/products/brilliant-violet-510-anti-mouse-cd279-pd-1-antibody-14923</a>                                                                                                                                                                               |
| Tim-3        | PE             | Mouse       | B8.2C12     | Biologend      | 134004        | 1 : 100       | <a href="https://www.biologend.com/en-us/products/pe-anti-mouse-cd366-tim-3-antibody-5908">https://www.biologend.com/en-us/products/pe-anti-mouse-cd366-tim-3-antibody-5908</a>                                                                                                                                                                                                                   |
| CD45.1       | PerCp-Cy5.5    | Mouse       | A20         | BD Biosciences | 560580        | 1 : 100       | <a href="https://www.bdbiosciences.com/en-eu/products/reagents/flow-cytometry-reagents/research-reagents/single-color-antibodies-ruo/percp-cy-5-5-mouse-anti-mouse-cd45-1-560580">https://www.bdbiosciences.com/en-eu/products/reagents/flow-cytometry-reagents/research-reagents/single-color-antibodies-ruo/percp-cy-5-5-mouse-anti-mouse-cd45-1-560580</a>                                     |
| CD45.2       | BV785          | Mouse       | 104         | Biologend      | 109839        | 1 : 100       | <a href="https://www.biologend.com/en-us/products/brilliant-violet-785-anti-mouse-cd45-2-antibody-8924">https://www.biologend.com/en-us/products/brilliant-violet-785-anti-mouse-cd45-2-antibody-8924</a>                                                                                                                                                                                         |
| PD-L1        | BV785          | Mouse       | 10F.9G2     | Biologend      | 124331        | 1 : 100       | <a href="https://www.biologend.com/en-us/products/brilliant-violet-785-anti-mouse-cd274-b7-h1-pd-l1-antibody-13497">https://www.biologend.com/en-us/products/brilliant-violet-785-anti-mouse-cd274-b7-h1-pd-l1-antibody-13497</a>                                                                                                                                                                 |
| iNOS         | PE             | Mouse       | CXNFT       | ThermoFisher   | 12-5920-82    | 1 : 100       | <a href="https://www.thermofisher.com/antibody/product/iNOS-Antibody-clone-CXNFT-Monoclonal/12-5920-82">https://www.thermofisher.com/antibody/product/iNOS-Antibody-clone-CXNFT-Monoclonal/12-5920-82</a>                                                                                                                                                                                         |
| Arginase-1   | APC            | Mouse       | A1exF5      | ThermoFisher   | 17-3697-82    | 1 : 100       | <a href="https://www.thermofisher.com/antibody/product/Arginase-1-Antibody-clone-A1exF5-Monoclonal/17-3697-82">https://www.thermofisher.com/antibody/product/Arginase-1-Antibody-clone-A1exF5-Monoclonal/17-3697-82</a>                                                                                                                                                                           |
| TREM2        | Alexafluor 647 | Mouse/Human | 237920      | R&D Systems    | FAB17291R-025 | 1 : 50        | <a href="https://www.rndsystems.com/products/human-mouse-trem-2-alexa-fluor-647-conjugated-antibody-237920_fab17291r">https://www.rndsystems.com/products/human-mouse-trem-2-alexa-fluor-647-conjugated-antibody-237920_fab17291r</a>                                                                                                                                                             |
| F4/80        | BV421          | Mouse       | BM8         | Biologend      | 123137        | 1 : 100       | <a href="https://www.biologend.com/en-us/products/brilliant-violet-421-anti-mouse-f4-80-antibody-7199">https://www.biologend.com/en-us/products/brilliant-violet-421-anti-mouse-f4-80-antibody-7199</a>                                                                                                                                                                                           |
| CD206        | BV605          | Mouse       | C068C2      | Biologend      | 141721        | 1 : 50        | <a href="https://www.biologend.com/en-us/products/brilliant-violet-605-anti-mouse-cd206-mm-antibody-8729">https://www.biologend.com/en-us/products/brilliant-violet-605-anti-mouse-cd206-mm-antibody-8729</a>                                                                                                                                                                                     |
| CD11c        | BV711          | Mouse       | N418        | Biologend      | 117349        | 1 : 100       | <a href="https://www.biologend.com/en-us/products/brilliant-violet-711-anti-mouse-cd11c-antibody-10175">https://www.biologend.com/en-us/products/brilliant-violet-711-anti-mouse-cd11c-antibody-10175</a>                                                                                                                                                                                         |
| PD-L1        | BV785          | Mouse       | 10F.9G2     | Biologend      | 124331        | 1 : 100       | <a href="https://www.biologend.com/en-us/products/brilliant-violet-785-anti-mouse-cd274-b7-h1-pd-l1-antibody-13497">https://www.biologend.com/en-us/products/brilliant-violet-785-anti-mouse-cd274-b7-h1-pd-l1-antibody-13497</a>                                                                                                                                                                 |
| CXCR2        | APC            | Mouse       | M5/114.15.2 | Biologend      | 149312        | 1 : 100       | <a href="https://www.biologend.com/en-us/products/apc-anti-mouse-cd182-antibody-15676">https://www.biologend.com/en-us/products/apc-anti-mouse-cd182-antibody-15676</a>                                                                                                                                                                                                                           |
| CD66a        | APC-Cy7        | Mouse       | 10F.9G2     | Biologend      | 134540        | 1 : 100       | <a href="https://www.biologend.com/en-us/products/apccyanine7-anti-mouse-cd66a-ceacam1a-antibody-19636">https://www.biologend.com/en-us/products/apccyanine7-anti-mouse-cd66a-ceacam1a-antibody-19636</a>                                                                                                                                                                                         |
| CD44         | BV510          | Mouse       | M1/70       | Biologend      | 103044        | 1 : 100       | <a href="https://www.biologend.com/en-us/products/brilliant-violet-510-anti-mouse-human-cd44-antibody-7994">https://www.biologend.com/en-us/products/brilliant-violet-510-anti-mouse-human-cd44-antibody-7994</a>                                                                                                                                                                                 |
| Ly6G         | BV421          | Mouse       | 1A8         | ThermoFisher   | 404-9668-82   | 1 : 100       | <a href="https://www.thermofisher.com/antibody/product/Ly-6G-Antibody-clone-1A8-Ly6g-Monoclonal/404-9668-82">https://www.thermofisher.com/antibody/product/Ly-6G-Antibody-clone-1A8-Ly6g-Monoclonal/404-9668-82</a>                                                                                                                                                                               |
| Ly6C         | PerCp/Cy5.5    | Mouse       | MAb-CC1     | Biologend      | 128012        | 1 : 100       | <a href="https://www.biologend.com/en-us/products/percp-cyanine5-5-anti-mouse-ly-6c-antibody-5967">https://www.biologend.com/en-us/products/percp-cyanine5-5-anti-mouse-ly-6c-antibody-5967</a>                                                                                                                                                                                                   |
| Arginase-1   | FITC           | Mouse       | A1exF5      | ThermoFisher   | 53-3697-82    | 1 : 100       | <a href="https://www.thermofisher.com/antibody/product/Arginase-1-Antibody-clone-A1exF5-Monoclonal/53-3697-82">https://www.thermofisher.com/antibody/product/Arginase-1-Antibody-clone-A1exF5-Monoclonal/53-3697-82</a>                                                                                                                                                                           |
| CD62L        | PE-Cy7         | Mouse       | HK1.4       | Biologend      | 104418        | 1 : 100       | <a href="https://www.biologend.com/en-us/products/pe-cyanine7-anti-mouse-cd62l-antibody-1922">https://www.biologend.com/en-us/products/pe-cyanine7-anti-mouse-cd62l-antibody-1922</a>                                                                                                                                                                                                             |
| I-A/I-E      | BV785          | Mouse       | SA044G4     | Biologend      | 107645        | 1 : 100       | <a href="https://www.biologend.com/en-us/products/brilliant-violet-785-anti-mouse-i-a-i-e-antibody-12087">https://www.biologend.com/en-us/products/brilliant-violet-785-anti-mouse-i-a-i-e-antibody-12087</a>                                                                                                                                                                                     |
| PD-L1        | PE             | Mouse       | 10F.9G2     | Biologend      | 124308        | 1 : 100       | <a href="https://www.biologend.com/en-us/products/pe-anti-mouse-cd274-b7-h1-pd-l1-antibody-4497">https://www.biologend.com/en-us/products/pe-anti-mouse-cd274-b7-h1-pd-l1-antibody-4497</a>                                                                                                                                                                                                       |
| F4/80        | PE             | Mouse       | W20065B     | Biologend      | 111604        | 1 : 100       | <a href="https://www.biologend.com/en-us/products/pe-anti-mouse-f4-80-antibody-23902">https://www.biologend.com/en-us/products/pe-anti-mouse-f4-80-antibody-23902</a>                                                                                                                                                                                                                             |
| PD-L1        | BV510          | Mouse       | 10F.9G2     | BD Biosciences | 571067        | 1 : 100       | <a href="https://www.bdbiosciences.com/en-de/products/reagents/flow-cytometry-reagents/research-reagents/single-color-antibodies-ruo/BV510-Rat-Anti-Mouse-CD274-(PD-L1)/571067?tab=product_details">https://www.bdbiosciences.com/en-de/products/reagents/flow-cytometry-reagents/research-reagents/single-color-antibodies-ruo/BV510-Rat-Anti-Mouse-CD274-(PD-L1)/571067?tab=product_details</a> |
| CD3          | BV785          | Human       | SK7         | Biologend      | 344842        | 1 : 100       | <a href="https://www.biologend.com/en-us/products/brilliant-violet-785-anti-human-cd3-antibody-13305">https://www.biologend.com/en-us/products/brilliant-violet-785-anti-human-cd3-antibody-13305</a>                                                                                                                                                                                             |
| CD197 (CCR7) | PE-Cy7         | Human       | G043H7      | Biologend      | 353226        | 1 : 100       | <a href="https://www.biologend.com/en-us/products/pecyanine7-anti-human-cd197-ccr7-antibody-7694">https://www.biologend.com/en-us/products/pecyanine7-anti-human-cd197-ccr7-antibody-7694</a>                                                                                                                                                                                                     |
| CD45RA       | BV510          | Human       | HI100       | Biologend      | 304142        | 1 : 100       | <a href="https://www.biologend.com/en-us/products/brilliant-violet-510-anti-human-cd45ra-antibody-8007">https://www.biologend.com/en-us/products/brilliant-violet-510-anti-human-cd45ra-antibody-8007</a>                                                                                                                                                                                         |
| PD-1         | BV421          | Human       | EH12.2H7    | Biologend      | 329920        | 1 : 100       | <a href="https://www.biologend.com/en-us/products/brilliant-violet-421-anti-human-cd279-pd-1-antibody-7191">https://www.biologend.com/en-us/products/brilliant-violet-421-anti-human-cd279-pd-1-antibody-7191</a>                                                                                                                                                                                 |

|        |                |       |         |                |           |        |                                                                                                                                                                                                                                                                                                                                                                                                         |
|--------|----------------|-------|---------|----------------|-----------|--------|---------------------------------------------------------------------------------------------------------------------------------------------------------------------------------------------------------------------------------------------------------------------------------------------------------------------------------------------------------------------------------------------------------|
| Tim-3  | PE-CF594       | Human | 7D3     | BD Biosciences | 2059595   | 1 :100 | <a href="https://www.bdbiosciences.com/en-pl/products/reagents/flow-cytometry-reagents/research-reagents/single-color-antibodies-ruo/pe-cf594-mouse-anti-human-tim-3-cd366.565560?tab=product_details">https://www.bdbiosciences.com/en-pl/products/reagents/flow-cytometry-reagents/research-reagents/single-color-antibodies-ruo/pe-cf594-mouse-anti-human-tim-3-cd366.565560?tab=product_details</a> |
| Lag-3  | Alexafluor 700 | Human | 11C3C65 | Biolegend      | 369344    | 1 :100 | <a href="https://www.biolegend.com/en-us/products/alexa-fluor-reg-700-anti-human-cd223-lag-3-21598">https://www.biolegend.com/en-us/products/alexa-fluor-reg-700-anti-human-cd223-lag-3-21598</a>                                                                                                                                                                                                       |
| CD68   | Alexafluor 555 | Human | KP1     | Thermofisher   | 754068882 | 1 :200 | <a href="https://www.thermofisher.com/antibody/product/CD68-Antibody-clone-KP1-Monoclonal/754-0688-82">https://www.thermofisher.com/antibody/product/CD68-Antibody-clone-KP1-Monoclonal/754-0688-82</a>                                                                                                                                                                                                 |
| HLA-DR | Alexafluor 488 | Human | LN3     | Biolegend      | 327010    | 1 :200 | <a href="https://www.biolegend.com/en-us/products/alexa-fluor-488-anti-human-hla-dr-antibody-4167">https://www.biolegend.com/en-us/products/alexa-fluor-488-anti-human-hla-dr-antibody-4167</a>                                                                                                                                                                                                         |

**Table 1.**

| Gene       | Forward primer (5'→3')  | Reverse primer (5'→3')   |
|------------|-------------------------|--------------------------|
| Eef1a1     | ACGAGGCAATGTTGCTGGTGAC  | GTGTGACAATCCAGAACAGGAGC  |
| Arginase 1 | TTTTAGGGTTACGGCCGGTG    | CCTCGAGGCTGTCCTTTTGA     |
| Il10       | GGTTGCCAAGCCTTATCGGA    | GGGGAGAAAATCGATGACAGC    |
| Cd206      | GTTACCTGGAGTGATGGTTCTC  | AGGACATGCCAGGGTCACCTTT   |
| Cd163      | GGCTAGACGAAGTCATCTGCAC  | CTTCGTTGGTCAGCCTCAGAGA   |
| Tgfb       | TGACGTCAC TGGAGTTGTACGG | GGTTCATGTCATGGATGGTGC    |
| Cd86       | TGTTTCCGTGGAGACGCA      | TTGAGCCTTTGTAAATGG       |
| Inos       | GCCACCAACAATGGCAACAT    | TCGATGCACAAC TGGGTGAA    |
| Cxcl10     | ATCATCCCTGCGAGCCTATCCT  | GACCTTTTTTGGCTAAACGCTTTC |
| Trem2      | CTACCAGTGTCAGAGTCTCCGA  | CCTCGAAACTCGATGACTCCTC   |

**Table 2.**
